# Supplementary material
Source: PubMed Central journal article supplement (PMC2747480)
Supplement: NIHMS132591-supplement-1_si_001.pdf [file NIHMS132591-supplement-1_si_001.pdf]

Supporting information:

# **Apogossypol Derivatives as Pan-active Inhibitors of Anti-apoptotic B-cell lymphoma/leukemia-2 (Bcl-2) Family Proteins**

**Jun Wei, Shinichi Kitada, Michele F. Rega, John L. Stebbins, Dayong Zhai, Jason Cellitti,  
Hongbin Yuan, Aras Emdadi, Russell Dahl, Ziming Zhang, Li Yang, John C. Reed and Maurizio  
Pellecchia\***

*Burnham Institute for Medical Research, 10901 North Torrey Pines Rd, La Jolla, CA, 92037, USA.;*

\*Corresponding author: [mpellecchia@burnham.org](mailto:mpellecchia@burnham.org)

Phone: (858) 6463159

Fax: (858) 7955225

**Contents:****1. Experimental Section****2. Supplementary Figures****3. Supplementary Tables****4. Spectrums of key compounds (<sup>1</sup>H NMR and HPLC).****1. Experimental Section.****NMR Experiments.**

NMR-based binding assays have been conducted by acquiring one-dimensional <sup>1</sup>H experiments with 500 μL solution of Bcl-X<sub>L</sub> at 25 μM concentration, in absence and presence of added compounds, each at 200 μM concentration. By observing the aliphatic region of the spectra, binding could be readily detected due to chemical shift changes in active site methyl groups of Ile, Leu, Thr, Val or Ala (region between -0.8 and 0.3 ppm).<sup>1</sup> All experiments were performed with a 600 MHz spectrometer Bruker Avance 600 equipped with four rf channels and z-axis pulse-field gradients.

**Isothermal Titration Calorimetry Assays (ITC).**

Titration were performed using a VP-ITC or ITC200 calorimeter from Microcal (Northampton, MA). Bcl-X<sub>L</sub> was used at concentrations between 25 and 100 μM in 20 mM sodium phosphate buffer (pH 7.4) and 5-10% DMSO. Titrants were used at concentrations 10 to 15 fold that of the protein in the same buffer. Titrations were carried out at 25 °C. Data were analyzed using Microcal Origin software provided by the ITC manufacturer (Microcal, Northampton, MA).

***In Vitro* ADME Studies.**

**Liver Microsomal Stability.** Pooled rat liver microsomes (BD Biosciences, # 452701) were preincubated with test compounds at 37.5 °C for 5 min in the absence of NADPH. The reaction was initiated by addition of NADPH and then incubated under the same conditions. The final incubation concentrations were 4 μM test compound, 2 mM NADPH, and 1 mg/mL (total protein) liver microsomes in phosphate-buffered saline (PBS) at pH 7.4. One aliquot (100 μL) of the incubation mixture was withdrawn at 0, 15, 30, and 60 min and combined immediately with 200 μL of ACN/MeOH containing an internal standard. After mixing, the sample was centrifuged at approximately 13,000 rpm for 12 min. The supernatant was transferred into an autosampler vial and the amount of test compound was quantified using the Shimadzu LCMS 2010EV mass spectrometer. The change of the AUC (area under the curve) of the parent compound as function of time was used as a measure of microsomal stability.

**Plasma Stability.** A 20 μL aliquot of a 10 mM solution in DMSO of the test compound was added to 2.0 mL of heparinized rat plasma (Lampire, P1-150N) to obtain a 100 μM final solution. The mixture was incubated for 1 h at 37.5 °C. Aliquots of 100 μL were taken (0, 30 min, 1 h) and diluted with 200 μL of MeOH containing internal standard. After mixing, the sample was centrifuged at approximately 13,000 rpm for 12 min. The supernatant was transferred into an autosampler vial and the amount of test compound was quantified using the Shimadzu LCMS-2010EV system. The change of the AUC (area under the curve) of the parent compound as function of time was used as a measure of microsomal stability.

**PAMPA (parallel artificial membrane permeation assay).** A 96-well microtiter plate (Millipore, # MSSACCEPTOR) was completely filled with aqueous buffer solution (pH 7.2) and covered with a microtiter filterplate (Millipore, # MAPBMN310). The hydrophobic filter material was impregnated with a 10% solution of hexadecane in hexane and the organic solvent was allowed to completely evaporate. Permeation studies were started by the transfer of 200 μL of a 100 μM test compound solution on top of the filterplate. In general phosphate buffer at pH 7.2 buffer was used. The maximum

DMSO content of the stock solutions was <5%. In parallel, an equilibrium solution lacking a membrane was prepared using the exact concentrations and specifications but lacking the membrane. The concentrations of the acceptor and equilibrium solutions were determined using the Shimadzu LCMS-2010EV and AUC methods. The permeation of a compound through the membrane layer is described by the percentage permeation (% flux). The flux values were calculated considering the concentration of the acceptor compartment after 8 h and that of a reference well with the same concentration containing no membrane barrier.

### **Maximum Tolerated Dose (MTD).**

Young female Balb/c mice (7-weeks-old) were injected with 100 mg/kg, 75 mg/kg, 50 mg/kg and 25 mg/kg of compound **8r** intraperitoneally (one mouse per dose) and observed for survival, vital signs, weight loss, etc. for 14 days, in compliance with MTD general protocol proposed by Developmental Therapeutics Program (DTP) at NCI. Compound **8r** was first dissolved in 100% ethanol, supplemented by Cremophore EL and saline, just before injection, with a ratio of Ethanol: Cremophore EL: Saline = 10:10:80. Upon conclusion of the study, mice were euthanized by CO<sub>2</sub>, and vital organs were harvested and fixed with z-FIX solution for 3 days at room temperature, rinsed in PBS three times, for further histological evaluation.

### **NMR data for compounds (7a-7t and 11a-11c)**

Following same synthetic procedure of compounds **7r** and **11e** and appropriate starting materials and reagents used; compounds (**7a-7t** and **11a-11c**) were synthesized.

**1,1',6,6',7,7'-Hexamethoxy-3,3'-dimethyl- N<sup>5</sup>,N<sup>5'</sup>-diphenyl-2,2'-binaphthyl-5,5'-dicarboxamide (7a).** Yield, 45%; <sup>1</sup>H NMR (600 MHz, CD<sub>3</sub>OD) δ 7.76 (d, *J* = 7.8 Hz, 4H), 7.59 (s, 2H), 7.52 (s, 2H), 7.40 (t, *J*<sub>1</sub> = *J*<sub>2</sub> = 7.8 Hz, 4H), 7.18 (s, 2H), 4.04 (s, 6H), 4.00 (s, 6H), 3.63 (s, 6H), 2.11 (s, 6H).

**N<sup>5</sup>,N<sup>5'</sup>-Dicyclopentyl-1,1',6,6',7,7'-hexamethoxy-3,3'-dimethyl-2,2'-binaphthyl-5,5'-dicarboxamide (7b).** Yield, 40%; <sup>1</sup>H NMR (600 MHz, CD<sub>3</sub>OD) δ 7.52 (s, 2H), 7.45 (s, 2H), 4.47 (m, 2H), 3.98 (s, 6H), 3.96 (s, 6H), 3.60 (s, 6H), 2.11 (m, 10H), 1.79 (s, 4H), 1.68 (s, 8H).

**1,1',6,6',7,7'-Hexamethoxy-3,3'-dimethyl-N<sup>5</sup>,N<sup>5'</sup>-bis(4-phenoxyphenyl)-2,2'-binaphthyl-5,5'-dicarboxamide (7c).** Yield, 46%; <sup>1</sup>H NMR (600 MHz, CD<sub>3</sub>OD) δ 7.76 (m, 6H), 7.59 (m, 2H), 7.53 (m, 2H), 7.35 (m, 2H), 7.11 (m, 2H), 7.03 (m, 8H), 4.00 (s, 6H), 4.00 (s, 6H), 3.63 (s, 6H), 2.12 (s, 6H).

**N<sup>5</sup>,N<sup>5'</sup>-Bis(3-ethylphenyl)-1,1',6,6',7,7'-hexamethoxy-3,3'-dimethyl-2,2'-binaphthyl-5,5'-dicarboxamide (7d).** Yield, 47%; <sup>1</sup>H NMR (600 MHz, CD<sub>3</sub>OD) δ 7.62 (s, 2H), 7.58 (m, 4H), 7.52 (s, 2H), 7.30 (m, 2H), 7.05 (m, 2H), 4.04 (s, 6H), 3.99 (s, 6H), 3.63 (s, 6H), 2.54 (q,  $J_1 = J_2 = 8.4$  Hz, 4H), 2.11 (s, 6H), 1.28 (t,  $J_1 = J_2 = 8.4$  Hz, 6H).

**1,1',6,6',7,7'-Hexamethoxy-3,3'-dimethyl-N<sup>5</sup>,N<sup>5'</sup>-bis(3-(trifluoromethyl)phenyl)-2,2'-binaphthyl-5,5'-dicarboxamide (7e).** Yield, 50%; <sup>1</sup>H NMR (600 MHz, CD<sub>3</sub>OD) δ 7.88 (s, 2H), 7.77 (d,  $J = 6.6$  Hz, 2H), 7.60 (m, 4H), 7.54 (s, 2H), 7.36 (s, 2H), 4.77 (s, 4H), 3.99 (s, 6H), 3.94 (s, 6H), 3.58 (s, 6H), 2.05 (s, 6H).

**1,1',6,6',7,7'-Hexamethoxy-3,3'-dimethyl-N<sup>5</sup>,N<sup>5'</sup>-bis(1-phenylpropyl)-2,2'-binaphthyl-5,5'-dicarboxamide (7f).** Yield, 46%; <sup>1</sup>H NMR (600 MHz, CD<sub>3</sub>OD) δ 7.50 (m, 6H), 7.38 (m, 4H), 7.26 (m, 4H), 5.12 (s, 2H), 4.01 (s, 6H), 4.00 (s, 6H), 3.89 (s, 6H), 3.58 (s, 3H), 3.55 (s, 3H), 1.95 (m, 10H), 1.10 (s, 6H).

**N<sup>5</sup>,N<sup>5'</sup>-Dibenzyl-1,1',6,6',7,7'-hexamethoxy-3,3'-dimethyl-2,2'-binaphthyl-5,5'-dicarboxamide (7g).** Yield, 49%; <sup>1</sup>H NMR (600 MHz, CD<sub>3</sub>OD) δ 7.53 (m, 6H), 7.38 (m, 6H), 7.30 (m, 2H), 4.68 (s, 4H), 4.00 (s, 6H), 3.91 (s, 6H), 3.57 (s, 6H), 2.02 (s, 6H).

**1,1',6,6',7,7'-Hexamethoxy-3,3'-dimethyl-N<sup>5</sup>,N<sup>5'</sup>-bis(3-methylbenzyl)-2,2'-binaphthyl-5,5'-dicarboxamide (7h).** Yield, 43%; <sup>1</sup>H NMR (600 MHz, CD<sub>3</sub>OD) δ 7.52 (s, 2H), 7.36 (d,  $J = 7.8$  Hz, 4H), 7.29 (d,  $J = 7.8$  Hz, 2H), 7.26 (t,  $J_1 = 7.8$  Hz,  $J_2 = 7.2$  Hz, 2H), 7.11 (d,  $J = 7.2$  Hz, 2H), 4.64 (s, 4H), 4.00 (s, 6H), 3.92 (s, 6H), 3.57 (s, 6H), 2.37 (s, 6H), 2.02 (s, 6H).

**N<sup>5</sup>,N<sup>5'</sup>-Bis(3-chlorobenzyl)-1,1',6,6',7,7'-hexamethoxy-3,3'-dimethyl-2,2'-binaphthyl-5,5'-dicarboxamide (7i).** Yield, 46%; <sup>1</sup>H NMR (600 MHz, CD<sub>3</sub>OD) δ 7.61 (s, 2H), 7.53 (s, 2H), 7.42 (d,  $J = 6.6$  Hz, 2H), 7.36 (m, 4H), 7.31 (d,  $J = 7.2$  Hz, 2H), 4.68 (s, 4H), 4.00 (s, 6H), 3.98 (s, 6H), 3.58 (s, 6H), 2.07 (s, 6H).

**1,1',6,6',7,7'-Hexamethoxy-3,3'-dimethyl-N<sup>5</sup>,N<sup>5'</sup>-bis(2,4,6-trimethylbenzyl)-2,2'-binaphthyl-5,5'-dicarboxamide (7j).** Yield, 40%; <sup>1</sup>H NMR (600 MHz, CD<sub>3</sub>OD) δ 7.48 (s, 2H), 7.41 (s, 2H), 6.96 (s, 2H), 6.88 (s, 2H), 3.92 (s, 6H), 3.87 (s, 6H), 3.55 (s, 6H), 3.39 (s, 6H), 2.46 (s, 6H), 2.27 (s, 6H), 2.05 (s, 6H).

**N<sup>5</sup>,N<sup>5'</sup>-Bis(1-(4-chlorophenyl)ethyl)-1,1',6,6',7,7'-hexamethoxy-3,3'-dimethyl-2,2'-binaphthyl-5,5'-dicarboxamide (7k).** Yield, 49%; <sup>1</sup>H NMR (600 MHz, CD<sub>3</sub>OD) δ 7.52 (m, 6H), 7.39 (m, 4H), 7.24 (s, 1H), 7.25 (s, 1H), 5.36 (m, 2H), 4.01 (s, 3H), 4.00 (s, 3H), 3.90 (s, 3H), 3.89 (s, 3H), 3.57 (s, 3H), 3.56 (s, 3H), 2.01 (s, 3H), 2.00 (s, 3H), 1.58 (s, 3H), 1.57 (s, 3H).

**N<sup>5</sup>,N<sup>5'</sup>-Bis(cyclopropylmethyl)-1,1',6,6',7,7'-hexamethoxy-3,3'-dimethyl-2,2'-binaphthyl-5,5'-dicarboxamide (7l).** Yield, 46%; <sup>1</sup>H NMR (600 MHz, CD<sub>3</sub>OD) δ 7.52 (s, 2H), 7.49 (s, 2H), 4.00 (s, 6H), 3.96 (s, 6H), 3.59 (s, 6H), 3.37 (d, *J* = 6.9 Hz, 4H), 2.10 (s, 6H), 1.2 (m, 2H), 0.59 (m, 4H), 0.37 (m, 4H).

**N<sup>5</sup>,N<sup>5'</sup>-Bis(cyclohexylmethyl)-1,1',6,6',7,7'-hexamethoxy-3,3'-dimethyl-2,2'-binaphthyl-5,5'-dicarboxamide (7m).** Yield, 50%; <sup>1</sup>H NMR (600 MHz, CD<sub>3</sub>OD) δ 7.52 (s, 2H), 7.45 (s, 2H), 4.02 (s, 6H), 3.94 (s, 6H), 3.59 (s, 6H), 3.33 (d, *J* = 17.4 Hz, 4H), 2.09 (s, 6H), 1.94 (d, *J* = 12.0 Hz, 4H), 1.80 (d, *J* = 12.0 Hz, 4H), 1.72 (d, *J* = 10.6 Hz, 4H), 1.39-1.07 (m, 10H).

**1,1',6,6',7,7'-Hexamethoxy-3,3'-dimethyl-N<sup>5</sup>,N<sup>5'</sup>-diphenethyl-2,2'-binaphthyl-5,5'-dicarboxamide (7n).** Yield, 51%; <sup>1</sup>H NMR (600 MHz, CD<sub>3</sub>OD) δ 7.51 (s, 2H), 7.36 (d, *J* = 7.2 Hz, 4H), 7.30 (m, 6H), 7.22 (t, *J*<sub>1</sub> = *J*<sub>2</sub> = 7.2 Hz, 2H), 4.00 (s, 6H), 3.89 (s, 6H), 3.78 (t, *J*<sub>1</sub> = 7.2 Hz, *J*<sub>2</sub> = 6.6 Hz, 4H), 3.57 (s, 6H), 3.02 (t, *J*<sub>1</sub> = 6.6 Hz, *J*<sub>2</sub> = 7.2 Hz, 4H), 2.04 (s, 6H).

**1,1',6,6',7,7'-Hexamethoxy-3,3'-dimethyl-N<sup>5</sup>,N<sup>5'</sup>-bis(3-methylphenethyl)-2,2'-binaphthyl-5,5'-dicarboxamide (7o).** Yield, 50%; <sup>1</sup>H NMR (600 MHz, CD<sub>3</sub>OD) δ 7.51 (s, 2H), 7.28 (s, 2H), 7.23 (m, 4H), 7.12 (m, 4H), 3.97 (s, 6H), 3.89 (s, 6H), 3.75 (s, 6H), 3.58 (m, 4H), 2.97 (m, 4H), 2.29 (s, 6H), 2.02 (s, 6H).

**N<sup>5</sup>,N<sup>5'</sup>-Bis(3-chlorophenethyl)-1,1',6,6',7,7'-hexamethoxy-3,3'-dimethyl-2,2'-binaphthyl-5,5'-dicarboxamide (7p).** Yield, 45%; <sup>1</sup>H NMR (600 MHz, CD<sub>3</sub>OD) δ 7.51 (s, 2H), 7.39 (s, 2H), 7.30 (d, *J*

= 4.2 Hz, 4H), 7.25 (m, 4H), 4.03 (s, 6H), 3.95 (s, 6H), 3.78 (m, 4H), 3.55 (s, 6H), 3.02 (t,  $J_1 = J_2 = 6.6$  Hz, 4H), 2.04 (s, 6H).

**N<sup>5</sup>,N<sup>5'</sup>-Bis(4-ethylphenethyl)-1,1',6,6',7,7'-hexamethoxy-3,3'-dimethyl-2,2'-binaphthyl-5,5'-dicarboxamide (7q).** Yield, 47%; <sup>1</sup>H NMR (600 MHz, CD<sub>3</sub>OD) δ 7.52 (s, 2H), 7.27 (s, 2H), 7.23 (d,  $J = 7.8$  Hz, 4H), 7.15 (d,  $J = 7.8$  Hz, 4H), 4.02 (s, 6H), 3.92 (s, 6H), 3.91 (m, 4H), 3.49 (s, 6H), 3.01 (t,  $J_1 = J_2 = 6.6$  Hz, 4H), 2.61 (q,  $J_1 = J_2 = 7.8$  Hz, 6H), 2.11 (s, 6H), 1.21 (t,  $J_1 = J_2 = 7.8$  Hz, 6H).

**N<sup>5</sup>,N<sup>5'</sup>-Bis(2,3-dihydro-1H-inden-2-yl)-1,1',6,6',7,7'-hexamethoxy-3,3'-dimethyl-2,2'-binaphthyl-5,5'-dicarboxamide (7s).** Yield, 47%; <sup>1</sup>H NMR (600 MHz, CD<sub>3</sub>OD) δ 7.50 (s, 2H), 7.45 (s, 2H), 7.26 (m, 4H), 7.15 (m, 4H), 4.94 (m, 2H), 3.99 (s, 6H), 3.90 (s, 6H), 3.56 (s, 6H), 3.43 (m, 4H), 3.07 (m, 4H), 2.08 (s, 6H).

**5,5'-Diisobutyl-1,1',6,6',7,7'-hexamethoxy-3,3'-dimethyl-2,2'-binaphthyl (11a).** Yield, 85%; <sup>1</sup>H NMR (600 MHz, CDCl<sub>3</sub>) δ 7.60 (s, 2H), 7.41 (s, 2H), 3.99 (s, 6H), 3.90 (s, 6H), 3.57 (s, 6H), 2.97 (d,  $J = 7.2$  Hz, 4H), 2.19 (s, 6H), 2.12 (m, 2H), 1.03 (t,  $J_1 = J_2 = 6.0$  Hz, 12H).

**5,5'-Diisopentyl-1,1',6,6',7,7'-hexamethoxy-3,3'-dimethyl-2,2'-binaphthyl (11b).** Yield, 81%; <sup>1</sup>H NMR (600 MHz, CDCl<sub>3</sub>) δ 7.63 (s, 2H), 7.38 (s, 2H), 3.99 (s, 6H), 3.96 (s, 6H), 3.59 (s, 6H), 3.08 (m, 4H), 2.2 (s, 6H), 1.80 (m, 2H), 1.29 (m, 4H), 1.06 (m, 12H).

**5,5'-Bis(cyclopentylmethyl)-1,1',6,6',7,7'-hexamethoxy-3,3'-dimethyl-2,2'-binaphthyl (11c).** Yield, 80%; <sup>1</sup>H NMR (600 MHz, CDCl<sub>3</sub>) δ 7.65 (s, 2H), 7.40 (s, 2H), 3.99 (s, 6H), 3.90 (s, 6H), 3.58 (s, 6H), 3.09 (d,  $J = 7.2$  Hz, 4H), 2.38 (m, 2H), 2.20 (s, 6H), 1.73 (m, 8H), 1.54 (m, 8H).

## 2. Supplementary Figures

### Supplementary Fig. 1.

#### ITC studies of 5, 5' substituted compound 2 derivatives

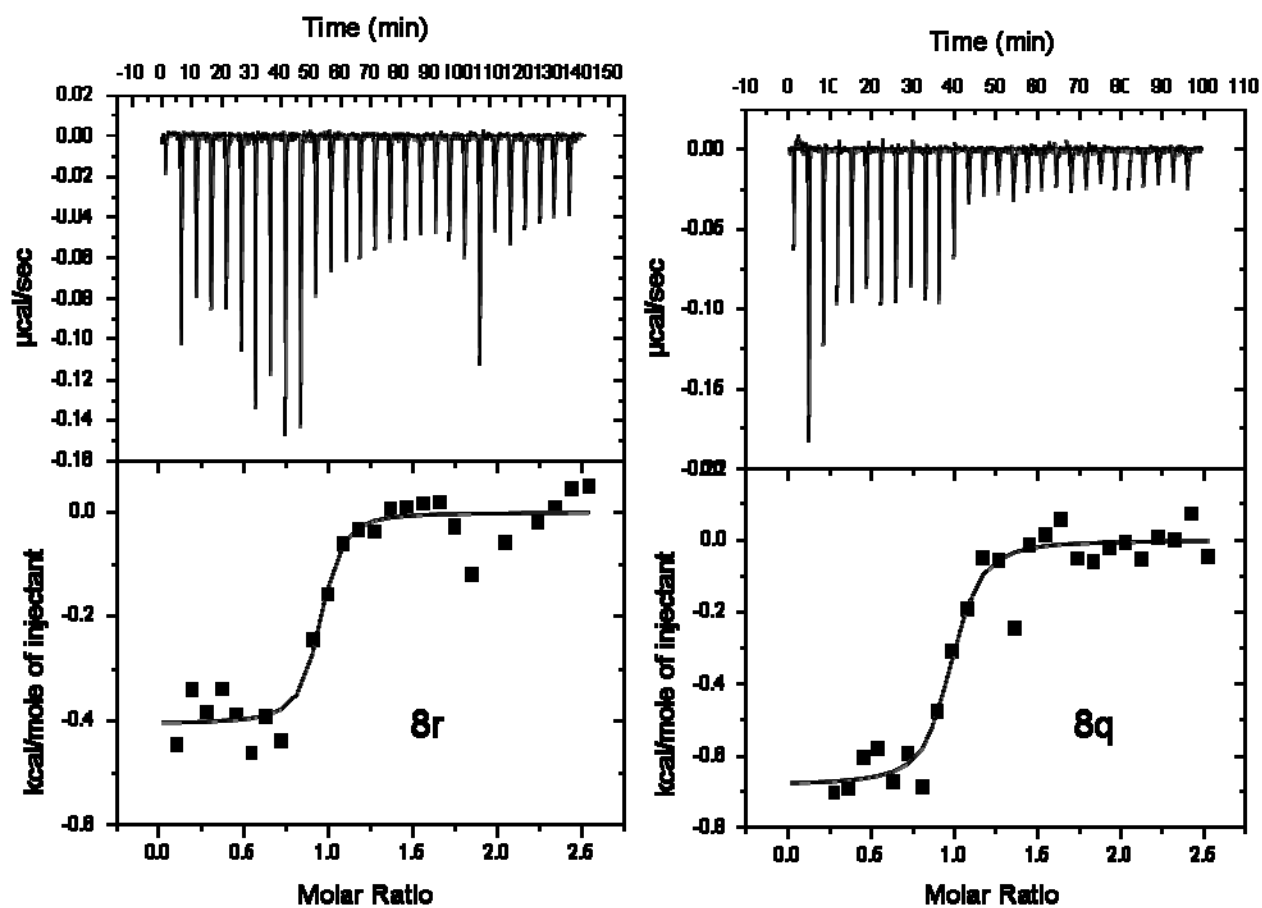

| Compound | n (stoichiometry) | $K_d$ (nM) | $\Delta H$ (kcal/mol) | $\Delta S$ (kcal/mol·K) |
|----------|-------------------|------------|-----------------------|-------------------------|
| 8q       | 0.95              | 121        | -680                  | 29                      |
| 8r       | 0.91              | 109        | -405                  | 31                      |

### Supplementary Figure 2:



(A) Compound 8r competes with the binding of Bcl-2 family proteins to FITC-Bim BH3 peptide.

(B) Cytotoxicity assays of ABT-737 against BP3 using Annexin V-FITC and propidium iodide assay

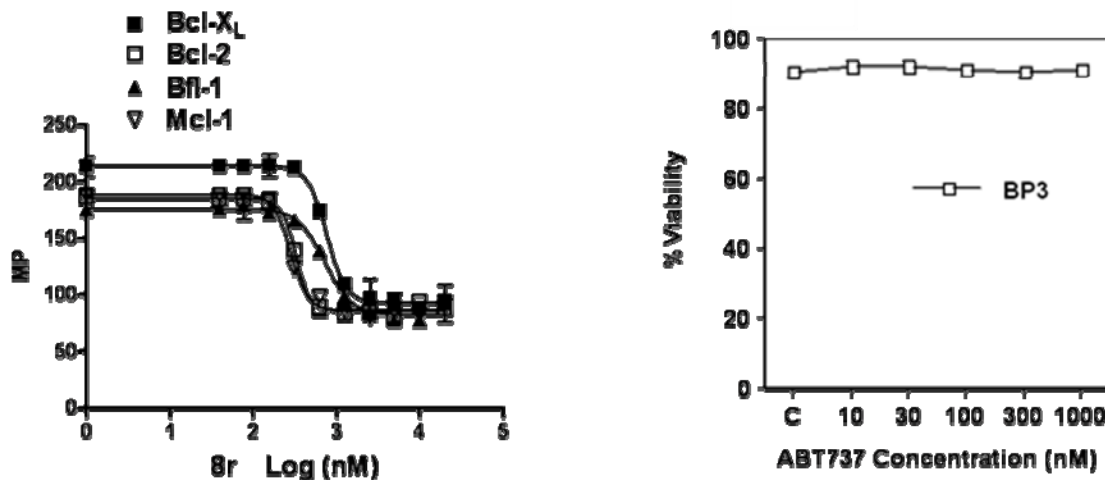

Supplementary Figure 3.

Cytotoxicity assays of 5, 5' substituted compound 2 derivatives against (A) BP3 cell and (B) RS11846 cancer cell lines using Annexin V-FITC and propidium iodide assay.

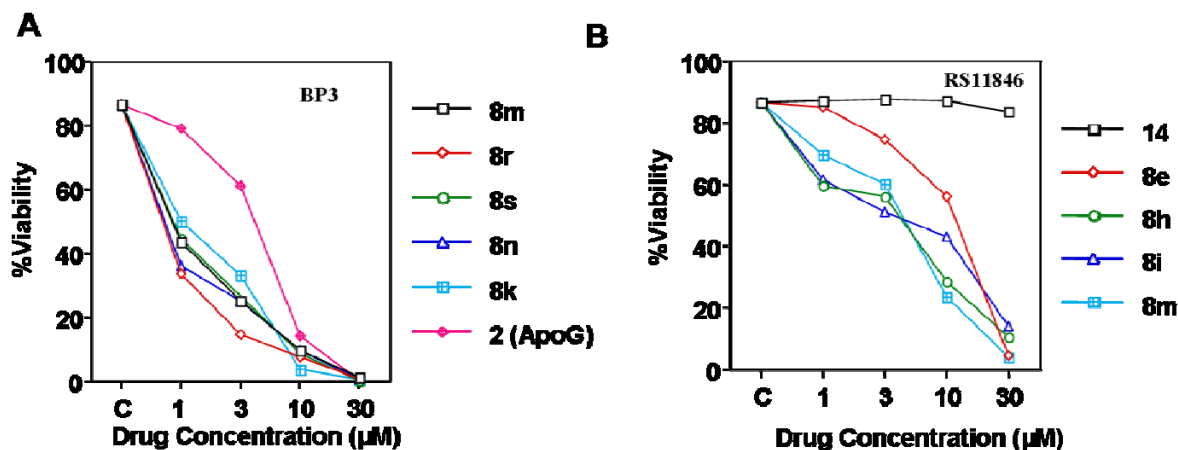

### 3. Supplementary Tables

Supplementary Table 1. Summary of Western blot analysis of BP3 and RS4;11 cancel cell line.

|        |       |       |        |       |
|--------|-------|-------|--------|-------|
|        | Mcl-1 | Bcl-2 | Bcl-xl | Bfl-1 |
| BP3    | +++   | No    | +      | +++   |
| RS4;11 | No    | ++++  | +      | No    |

**4-point rating scale for western data:**

**++++: Very high level**

**+++: High level**

**++: Medium level**

**+: Low**

**No: Not Detectable**

Supplementary Table. 2 Efficacy/Toxicity studies of 5, 5' substituted compound 2 derivatives against B6/Bcl-2 transgenic mice.

|          | 2  | 1  | 13 | 12e | 8k | 8m | 8p | 8q | 8r | 12c |
|----------|----|----|----|-----|----|----|----|----|----|-----|
| Efficacy | PR | PR | NR | PR  | CR | PR | CR | PR | CR | PR  |
| Toxicity | 0  | 2+ | 0  | 0   | 4+ | 4+ | 4+ | 4+ | 3+ | 1+  |

Toxicity Rating Scale: 4+ (lethal), 3+: severe, 2+: moderate, 1+: mild, 0: No toxicity

4. Spectrums of key compounds (<sup>1</sup>HNMR and HPLC).

H4

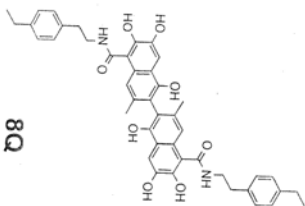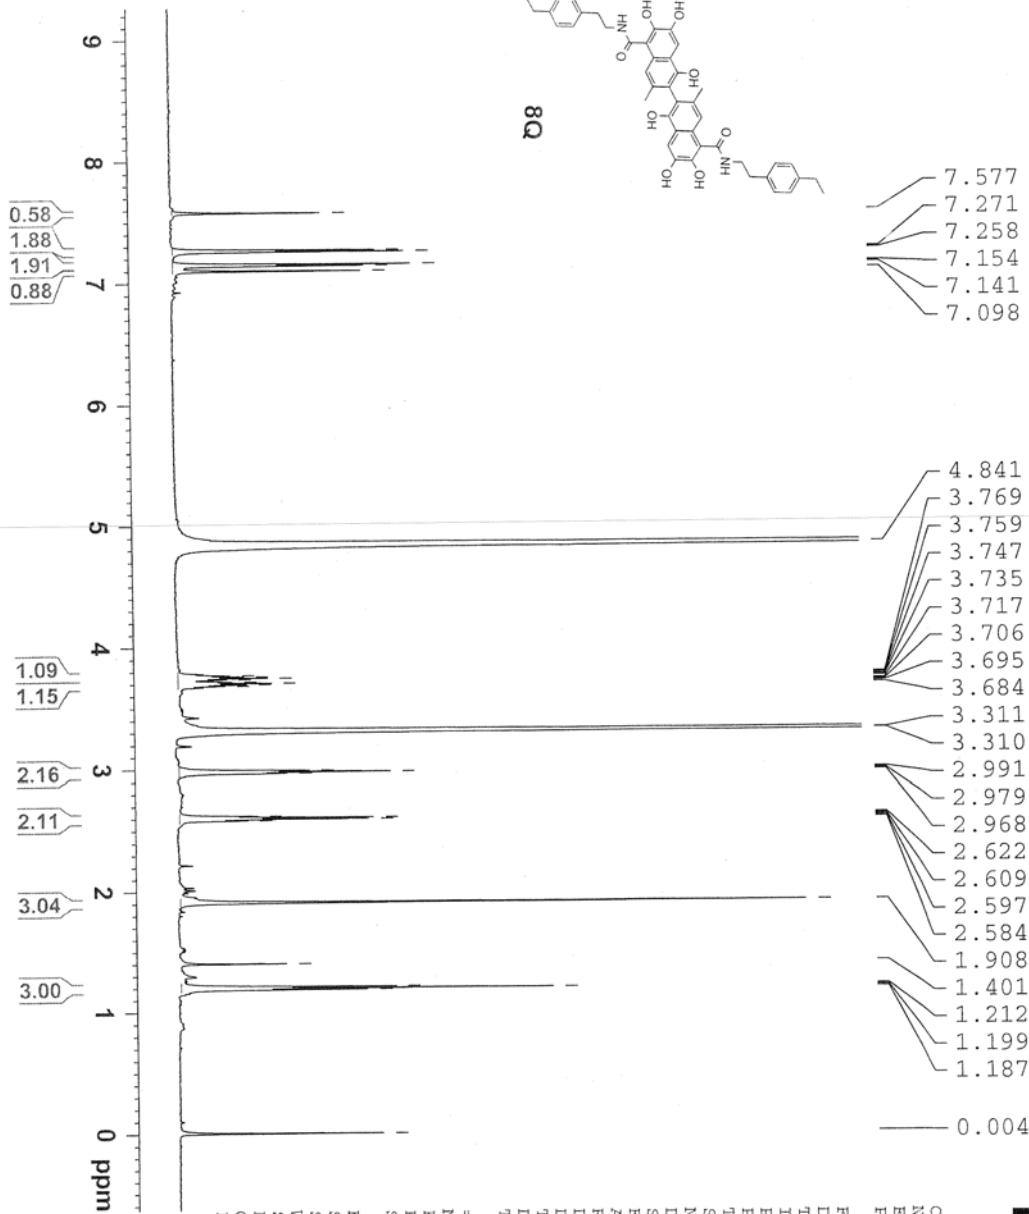

- 7.577
- 7.271
- 7.258
- 7.154
- 7.141
- 7.098

- 4.841
- 3.769
- 3.759
- 3.747
- 3.735
- 3.717
- 3.706
- 3.695
- 3.684
- 3.311
- 3.310
- 2.991
- 2.979
- 2.968
- 2.622
- 2.609
- 2.597
- 2.584
- 1.908
- 1.401
- 1.212
- 1.199
- 1.187
- 0.004

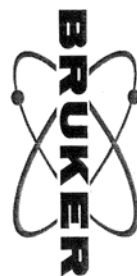

Current Data Parameters  
 NAME jun\_synthesis  
 EXPNO 652  
 PROCNO 1

F2 - Acquisition Parameters  
 Date\_ 20090102  
 Time 11.35  
 INSTRUM spect  
 PROBHD 5 mm TXI 1H/D-  
 PULPROG zg  
 TD 32768  
 SOLVENT DMSO  
 NS 16  
 DS 4  
 SWH 8389.262 Hz  
 FIDRES 0.256020 Hz  
 AQ 1.9530228 sec  
 RG 128  
 DW 59.600 usec  
 DE 6.50 usec  
 TE 300.6 K  
 D1 2.00000000 sec  
 TD0 1

==== CHANNEL f1 =====  
 NUC1 1H  
 P1 6.00 usec  
 PL1 0.00 dB  
 SFO1 600.1328210 MHz  
 F2 - Processing parameters  
 SI 65536  
 SF 600.1300145 MHz  
 WDW EM  
 SSB 0  
 LB 1.00 Hz  
 GB 0  
 PC 1.00

BI79H5 final prep

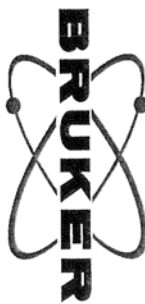

Current Data Parameters  
NAME jun\_synthesis  
EXPNO 701  
PROCNO 1

F2 - Acquisition Parameters  
Date\_ 20090218  
Time 0.23  
INSTRUM spect  
PROBHD 5 mm TXI 1H/D-  
PULPROG zg  
TD 32768  
SOLVENT MeOD  
NS 16  
DS 4  
SWH 8389.262 Hz  
FIDRES 0.256020 Hz  
AQ 1.9530228 sec  
RG 128  
DW 59.600 usec  
DE 6.50 usec  
TE 298.0 K  
D1 2.00000000 sec  
TD0 1

==== CHANNEL f1 =====  
NUC1 1H  
P1 6.00 usec  
PL1 0.00 dB  
SFO1 600.1328210 MHz  
F2 - Processing parameters  
SI 65536  
SF 600.130082 MHz  
WDW EM  
SSB 0  
LB 1.00 Hz  
GB 0  
PC 1.00

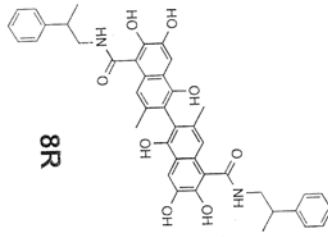

8R

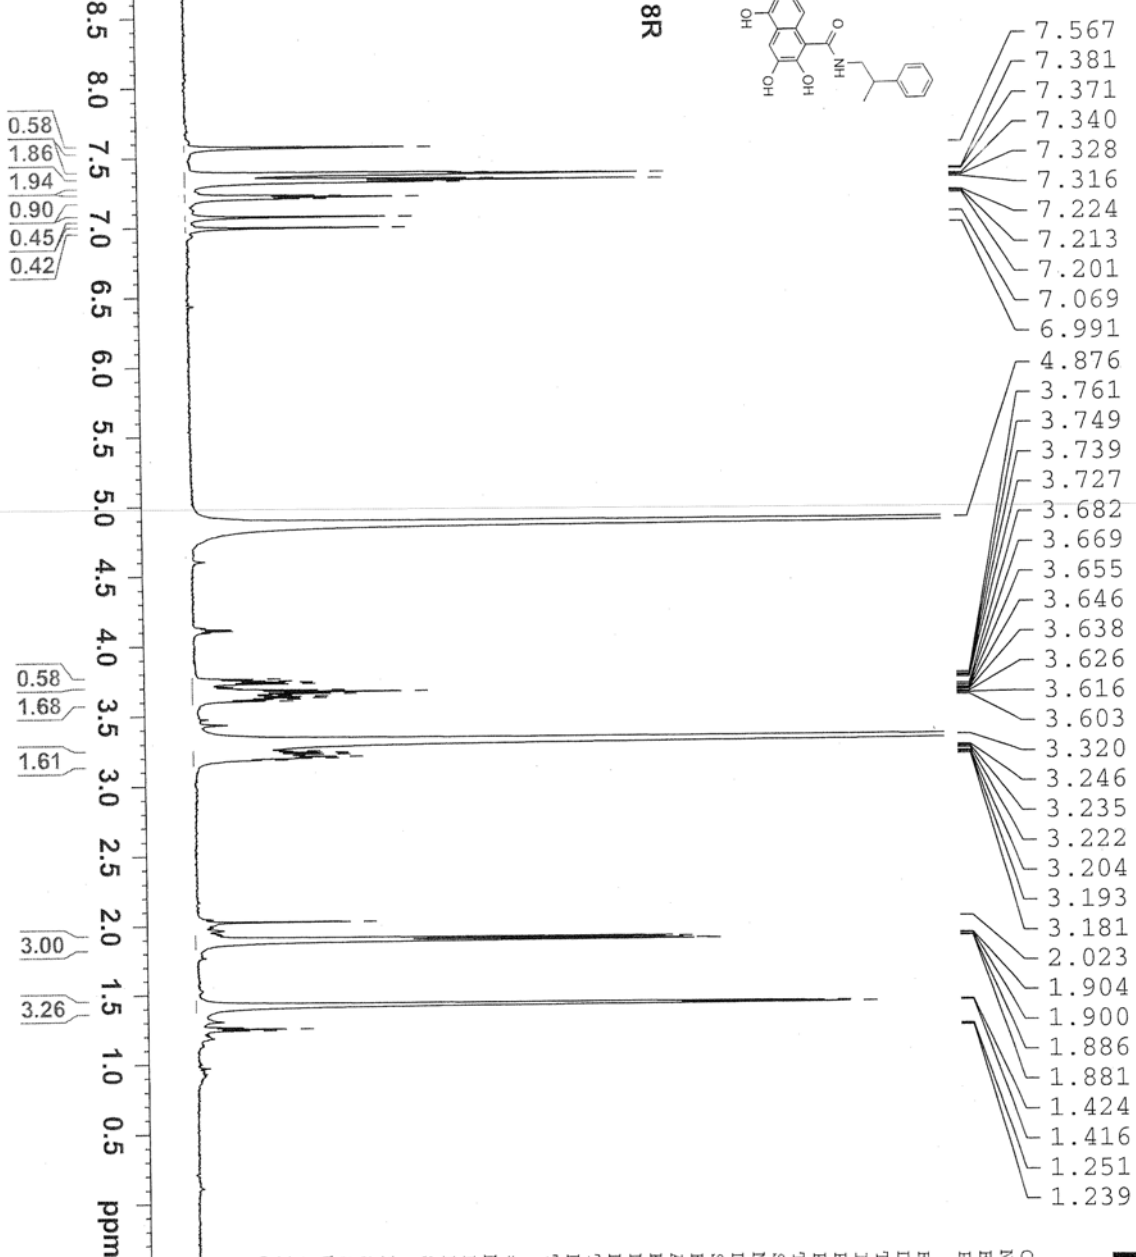

- 7.567
- 7.381
- 7.371
- 7.340
- 7.328
- 7.316
- 7.224
- 7.213
- 7.201
- 7.069
- 6.991
- 4.876
- 3.761
- 3.749
- 3.739
- 3.727
- 3.682
- 3.669
- 3.655
- 3.646
- 3.638
- 3.626
- 3.616
- 3.603
- 3.320
- 3.246
- 3.235
- 3.222
- 3.204
- 3.193
- 3.181
- 2.023
- 1.904
- 1.900
- 1.886
- 1.881
- 1.424
- 1.416
- 1.251
- 1.239

BI97A1 after prep

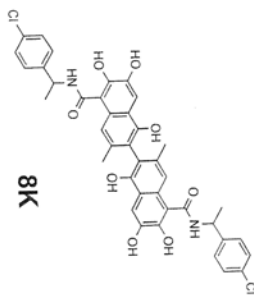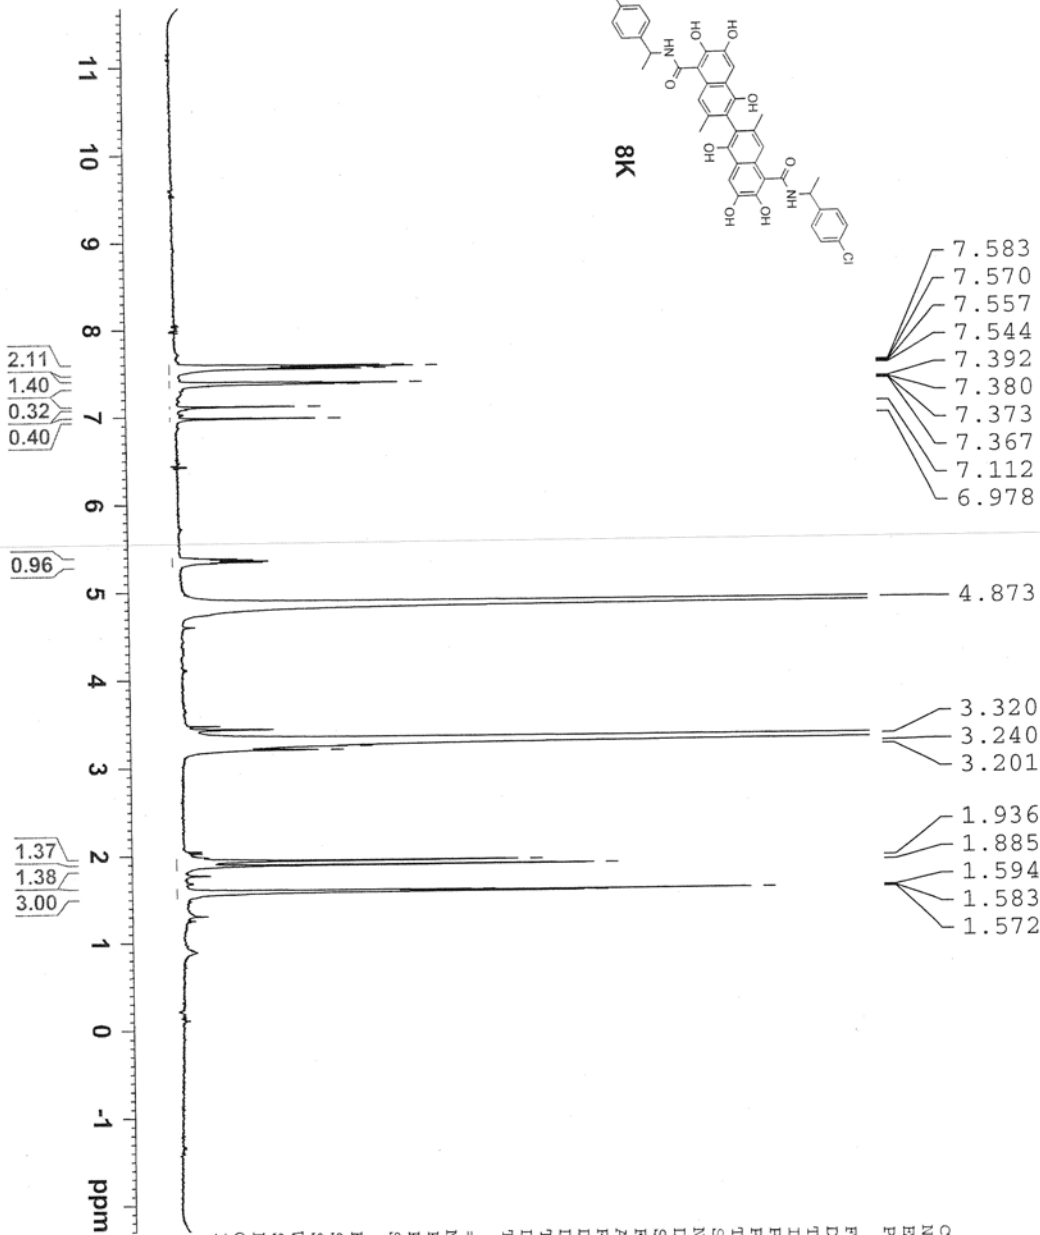

Current Data Parameters  
NAME jun\_synthesis  
EXPNO 695  
PROCNO 1

F2 - Acquisition Parameters

Date\_ 20090213  
Time 12.37  
INSTRUM spect  
PROBHD 5 mm TXI 1H/D-  
PULPROG zg  
TD 32768  
SOLVENT Acetone  
NS 128  
DS 4  
SWH 8389.262 Hz  
FIDRES 0.256020 Hz  
AQ 1.9530228 sec  
RG 128  
DW 59.600 usec  
DE 6.50 usec  
TE 298.3 K  
D1 2.00000000 sec  
TD0 1

==== CHANNEL f1 =====  
NUC1 1H  
P1 6.00 usec  
PL1 0.00 dB  
SFO1 600.1328210 MHz

F2 - Processing Parameters  
SI 65536  
SF 600.1300082 MHz  
WDW EM  
SSB 0  
LB 1.00 Hz  
GB 0  
PC 1.00

BI79H1

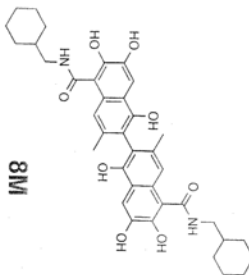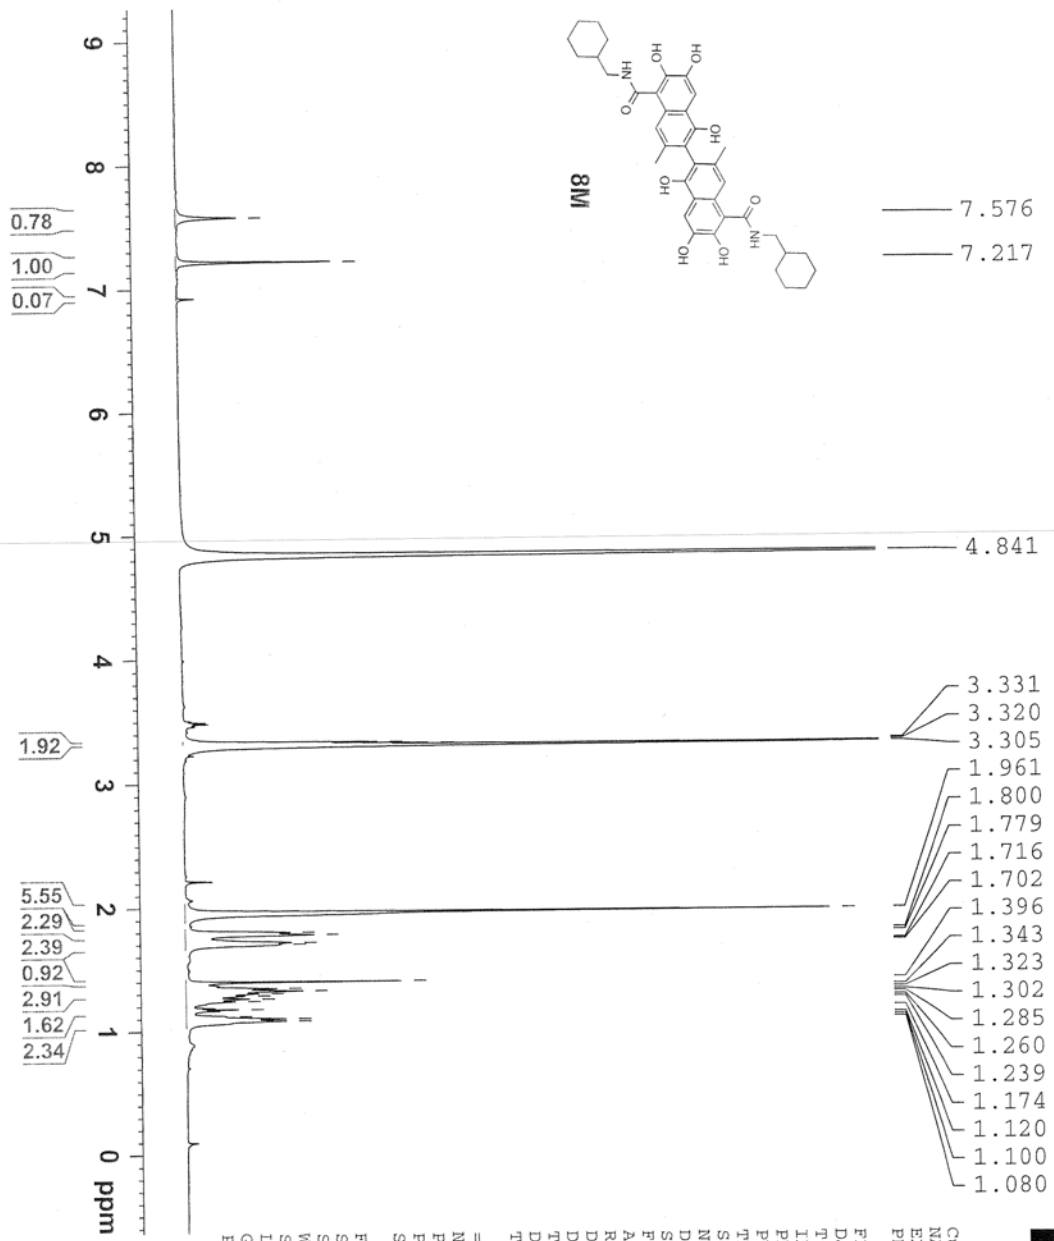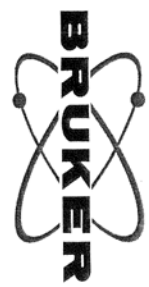

Current Data Parameters  
 NAME jun\_synthesis  
 EXPNO 606  
 PROCNO 1

F2 - Acquisition Parameters

Date\_ 20080930  
 Time 13.21  
 INSTRUM spect  
 PROBHD 5 mm TXI 1H/D-  
 PULPROG zg  
 TD 32000  
 SOLVENT MeOD  
 NS 16  
 DS 4  
 SWH 13227.514 Hz  
 FIDRES 0.413360 Hz  
 AQ 1.2096500 sec  
 RG 128  
 DW 37.800 usec  
 DE 6.50 usec  
 TE 300.4 K  
 D1 2.00000000 sec  
 TD0 1

==== CHANNEL f1 =====  
 NUC1 1H  
 P1 7.00 usec  
 PL1 -2.00 dB  
 SFO1 600.1328210 MHz

F2 - Processing parameters  
 SI 32768  
 SF 600.1300169 MHz  
 WDW EM  
 SSB 0  
 LB 2.00 Hz  
 GB 0  
 PC 1.00

BI79H3

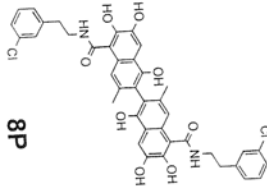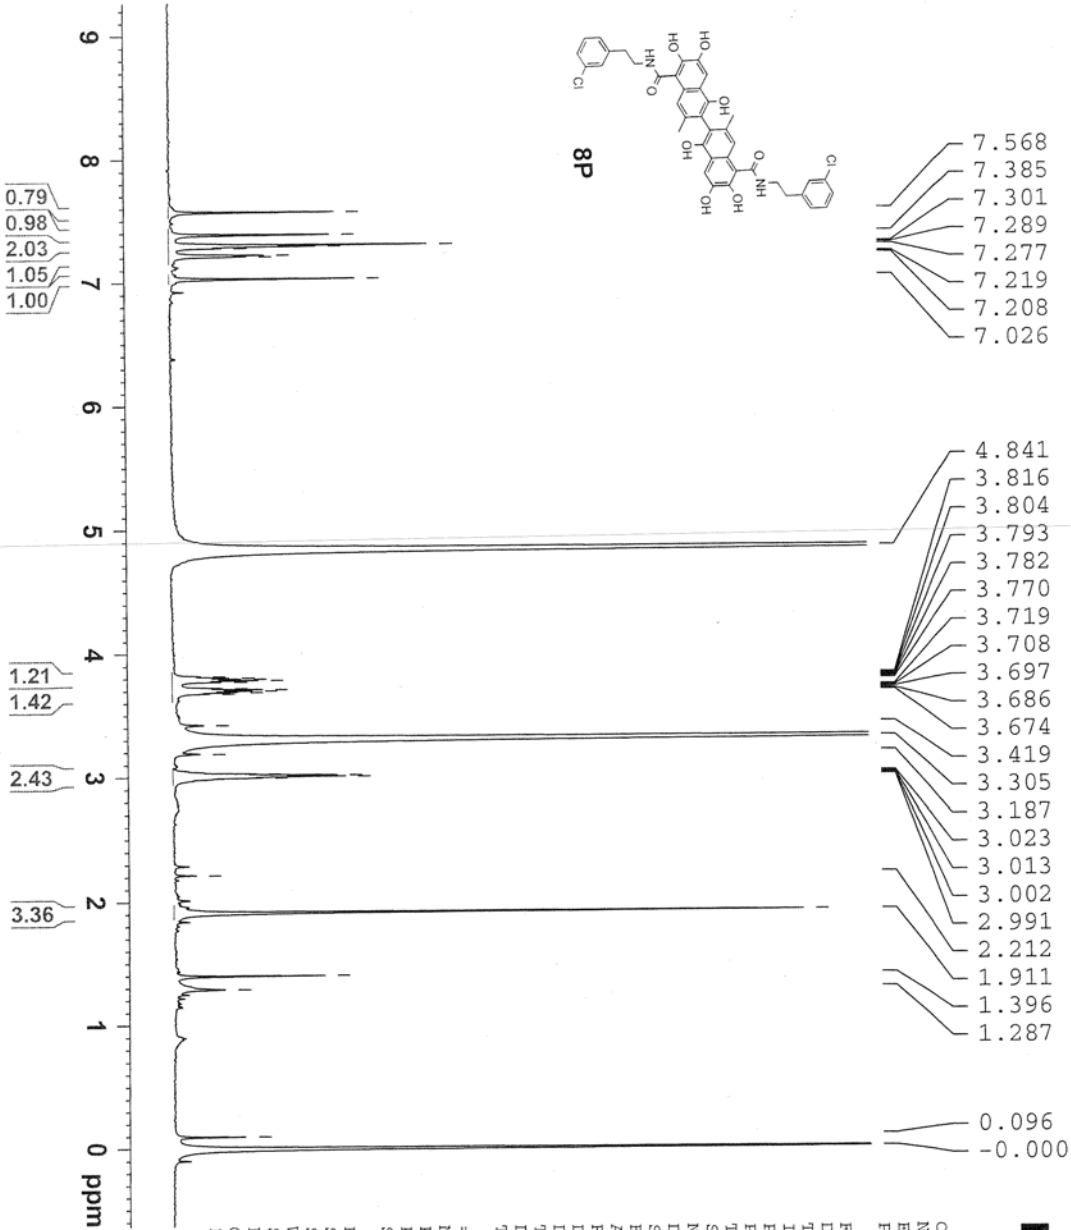

7.568  
7.385  
7.301  
7.289  
7.277  
7.219  
7.208  
7.026

4.841  
3.816  
3.804  
3.793  
3.782  
3.770  
3.719  
3.708  
3.697  
3.686  
3.674  
3.419  
3.305  
3.187  
3.023  
3.013  
3.002  
2.991  
2.212  
1.911  
1.396  
1.287

0.096  
-0.000

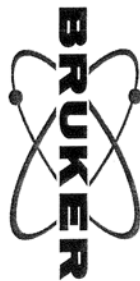

Current Data Parameters  
NAME jun\_synthesis  
EXPNO 616  
PROCNO 1

F2 - Acquisition Parameters  
Date\_ 20081006  
Time 10.04  
INSTRUM spect  
PROBHD 5 mm TXI 1H/D-  
PULPROG zg  
TD 32000  
SOLVENT MeOD  
NS 16  
DS 4  
SWH 13227.514 Hz  
FIDRES 0.413360 Hz  
AQ 1.2096500 sec  
RG 128  
DM 37.800 usec  
DE 6.90 usec  
TE 300.5 K  
D1 2.00000000 sec  
TD0 1

==== CHANNEL f1 =====  
NUC1 1H  
P1 7.00 usec  
PIA -2.00 dB  
SFO1 600.1328210 MHz  
F2 - Processing parameters  
SI 32768  
SF 600.1300169 MHz  
WDW EM  
SSB 0  
LB 2.00 Hz  
GB 0  
PC 1.00

burnham

Project Name: Defaults  
Reported by User: System

Breeze

### SAMPLE INFORMATION

Sample Name: H5 PREP FINAL  
Sample Type:  
Vial:  
Injection #:  
Injection Volume:  
Run Time:

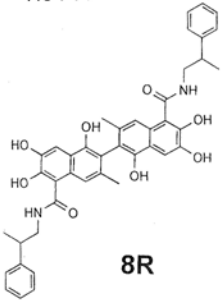

Acquired By: System  
Date Acquired: 2/17/2009 11:23:58 PM  
Acq. Method: Burnham 50\_95%BACN 220  
Date Processed: 3/21/2009 7:22:11 PM  
Channel Name: 2487Channel 1  
Sample Set Name M

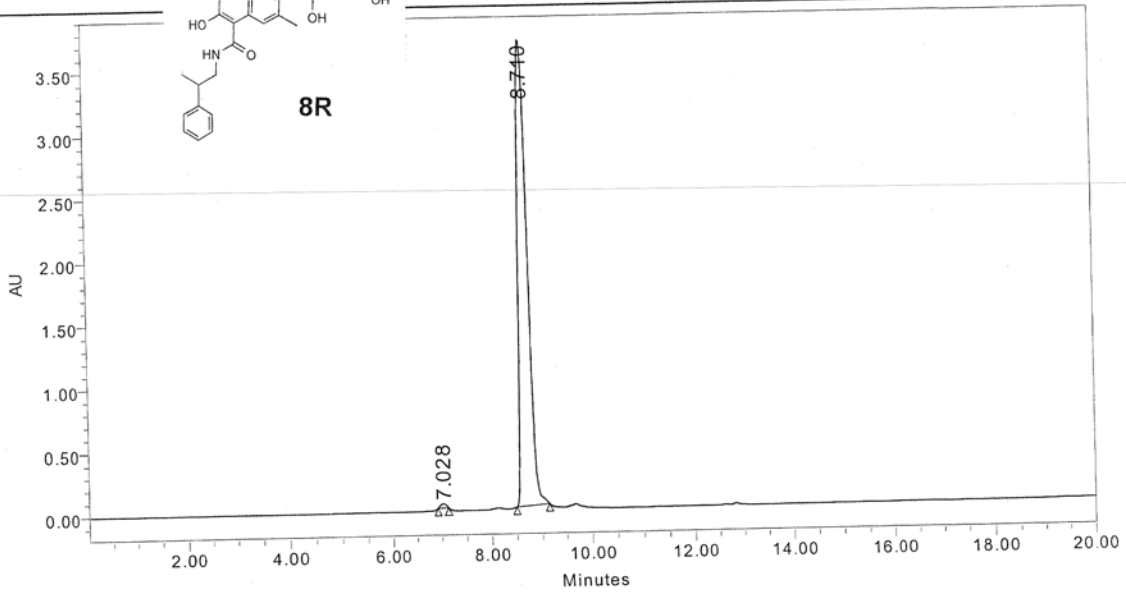

|   | RT (min) | Area ( $\mu V \cdot sec$ ) | % Area | Height ( $\mu V$ ) | % Height |
|---|----------|----------------------------|--------|--------------------|----------|
| 1 | 7.028    | 273747                     | 0.60   | 35036              | 0.94     |
| 2 | 8.710    | 45448782                   | 99.40  | 3702932            | 99.06    |



burnham

Project Name: Defaults  
Reported by User: System

Breeze

### SAMPLE INFORMATION

Sample Name: H4  
Sample Type:  
Vial:  
Injection #:  
Injection Volur  
Run Time:

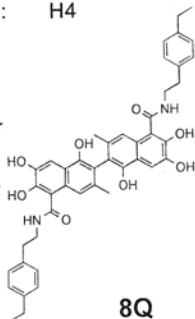

Acquired By: System  
Date Acquired: 12/22/2008 11:08:25 AM  
Acq. Method: Burnham 50\_95%BACN 220  
Date Processed: 12/22/2008 1:02:24 PM  
Channel Name: 2487Channel 1  
Sample Set Name H

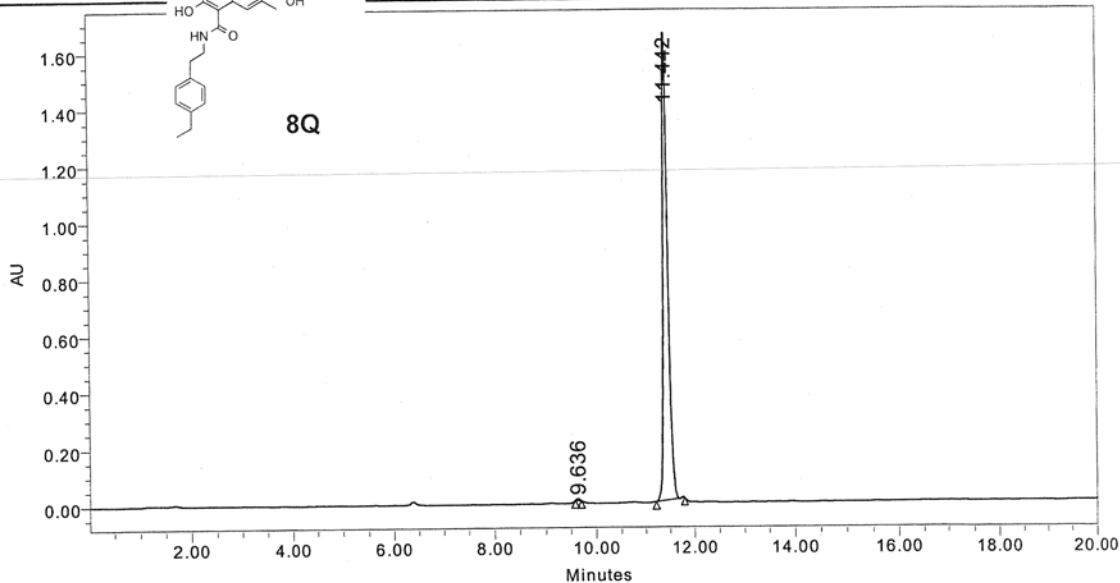

|   | RT (min) | Area ( $\mu V \cdot sec$ ) | % Area | Height ( $\mu V$ ) | % Height |
|---|----------|----------------------------|--------|--------------------|----------|
| 1 | 9.636    | 29469                      | 0.25   | 6959               | 0.42     |
| 2 | 11.442   | 11802246                   | 99.75  | 1669406            | 99.58    |

burnham

Project Name: Defaults  
Reported by User: System

Breeze

### SAMPLE INFORMATION

Sample Name: A1  
Sample Ty  
Vial:  
Injection #:  
Injection V:  
Run Time:

Acquired By: System  
Date Acquired: 12/22/2008 12:02:50 PM  
Acq. Method: Burnham 50\_95%BACN 220  
Date Processed: 12/22/2008 1:01:51 PM  
Channel Name: 2487Channel 1  
Sample Set Name H

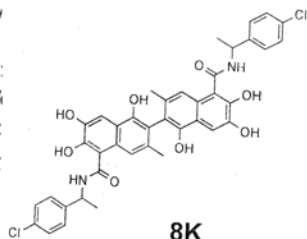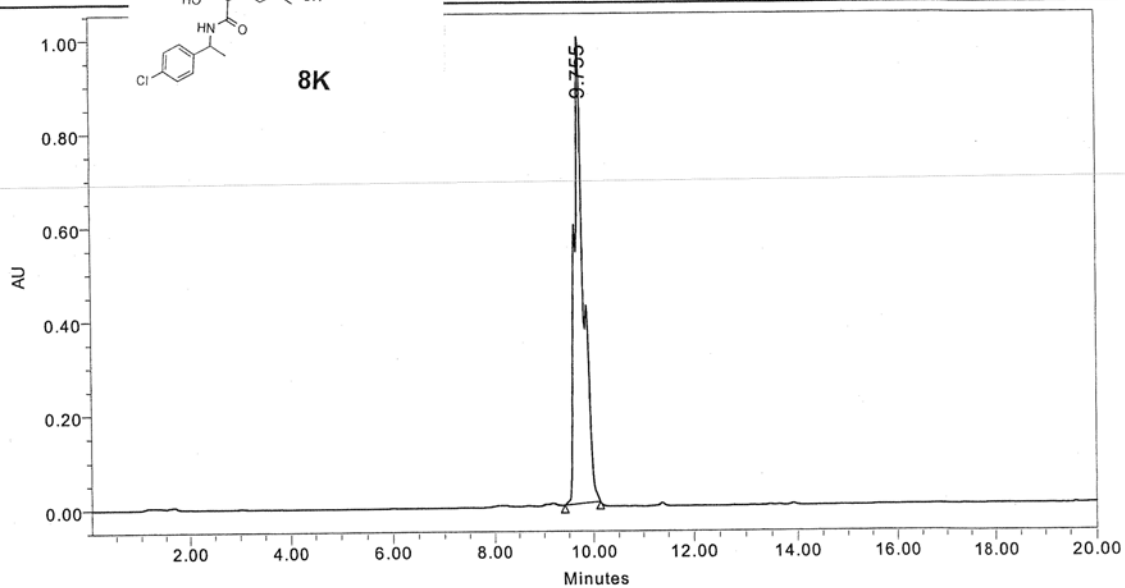

|   | RT<br>(min) | Area<br>( $\mu V \cdot sec$ ) | % Area | Height<br>( $\mu V$ ) | %<br>Height |
|---|-------------|-------------------------------|--------|-----------------------|-------------|
| 1 | 9.755       | 12578951                      | 100.00 | 991172                | 100.00      |

## References:

1. Rega, M. F.; Leone, M.; Jung, D.; Cotton, N. J.; Stebbins, J. L.; Pellecchia, M. Structure-based discovery of a new class of Bcl-xL antagonists. *Bioorg Chem* 2007, 35, 344-53.
